# Supplementary material for: Vulnerable species interactions are important for the stability of mutualistic networks
Source: bioRxiv or medRxiv preprint supplement (doi:10.1101/604868), 2019-04-10
Supplement: Supplementary file [file media-1.pdf]

# Supplementary Information: Vulnerable species interactions are important for the stability of mutualistic networks

---

Benno I. Simmons<sup>1\*</sup>, Hannah S. Wauchope<sup>1</sup>, Tatsuya Amano<sup>1,2,3</sup>, Lynn V. Dicks<sup>4</sup>, William J. Sutherland<sup>1</sup>, and Vasilis Dakos<sup>5</sup>

**1** Conservation Science Group, Department of Zoology, University of Cambridge, The David Attenborough Building, Pembroke Street, Cambridge, CB2 3QZ, United Kingdom; **2** Centre for the Study of Existential Risk, University of Cambridge, 16 Mill Lane, Cambridge, CB2 1SB, United Kingdom; **3** School of Biological Sciences, University of Queensland, Brisbane, 4072 Queensland, Australia; **4** School of Biological Sciences, University of East Anglia, NR4 7TL, United Kingdom; **5** Institut des Sciences de l'Evolution de Montpellier (ISEM) Université de Montpellier, place Eugène Bataillon, UMR 5554, CCo65, 34095 Montpellier cedex 05, France

\* Corresponding author: benno.simmons@gmail.com

---

**Figure S1: Relationship between link vulnerability and importance ( $\rho = 0.01$ )**

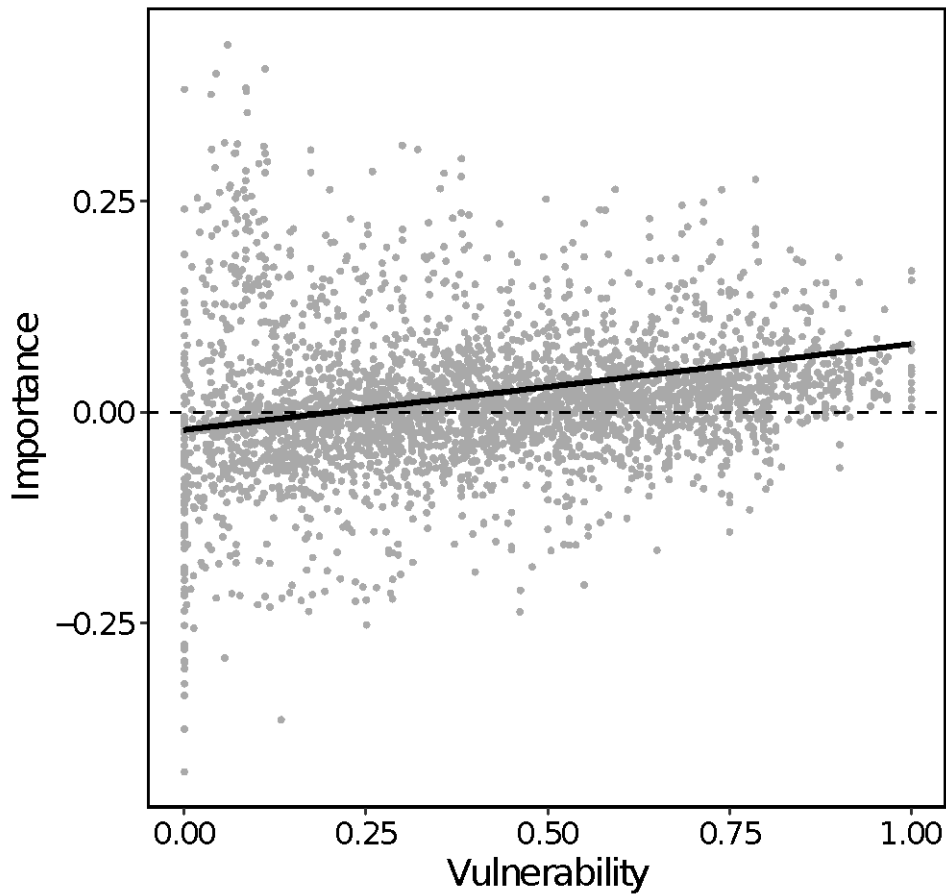

**Figure S1:** The relationship between vulnerability (the likelihood of a link being lost) and importance (the contribution of a link to a network's structural stability) for all species-species links across 41 mutualistic networks. Best fit line is from a mixed effects model with importance as the response variable, vulnerability as a fixed effect, and network identity as a random effect.

## Figure S2: Taxonomic consistency of vulnerability and importance ( $\rho = 0.01$ )

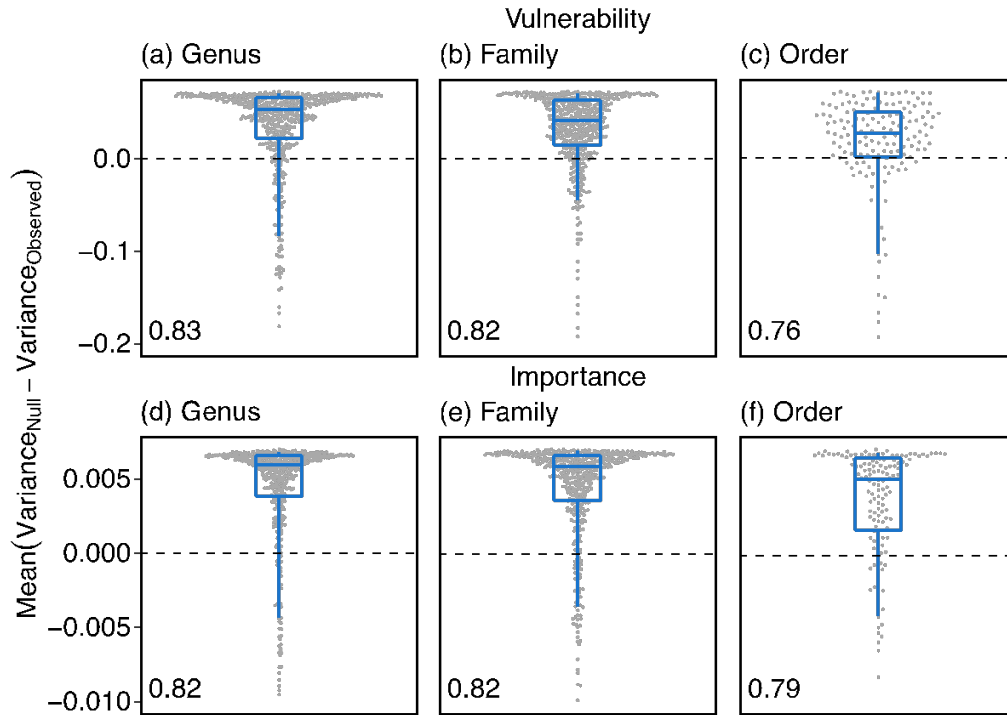

**Figure S2:** The degree of taxonomic consistency for each interaction at each taxonomic level, for both vulnerability (likelihood of a link being lost) and importance (contribution of a link to a network's structural stability). Taxonomic consistency is the tendency for properties of an interaction to be more similar across occurrences than expected by chance. Points represent individual interactions. Boxplots represent 5%, 25%, 50%, 75% and 95% quantiles of the same data, moving from the bottom whisker to the top whisker. Number in bottom left of each panel is the proportion of interactions which exhibited positive consistency ( $\text{Variance}_{\text{Observed}} < \text{Variance}_{\text{Null}}$ ). For visualisation, a small number of points with low values were removed. The percentage of points with values lower than the y-axis minimum are as follows for each panel: (a) 1.5%, (b) 1.1%, (d) 7.2%, (e) 6%, (f) 5.3%.
